# Supplementary material for: Sex-dependent treatment of chronic EAE with partial MHC class II constructs
Source: PubMed Central journal article supplement (PMC5420407; doi:10.1186/s12974-017-0873-y), 2017-05-06
Supplement: 12974_2017_873_MOESM1_ESM.pdf [file 12974_2017_873_MOESM1_ESM.pdf]

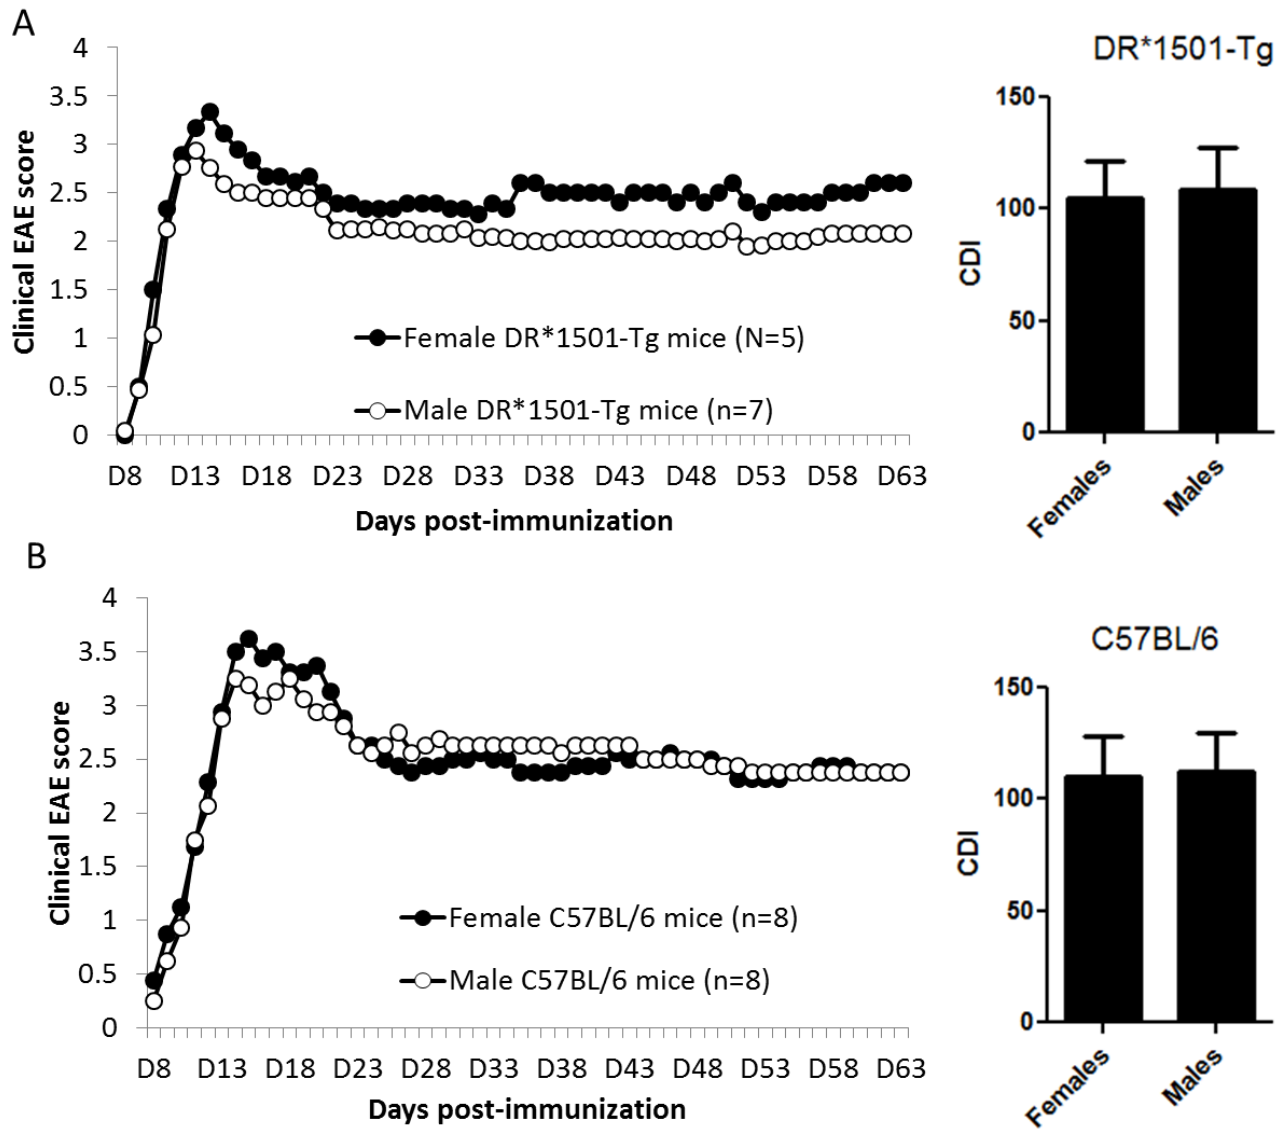

**Figure S1.** EAE disease course in female and male (A)DR\*1501-Tg and (B) C57BL/6 mice, immunized with mMOG-35-55 peptide.

## Female DR\*1501-Tg mice

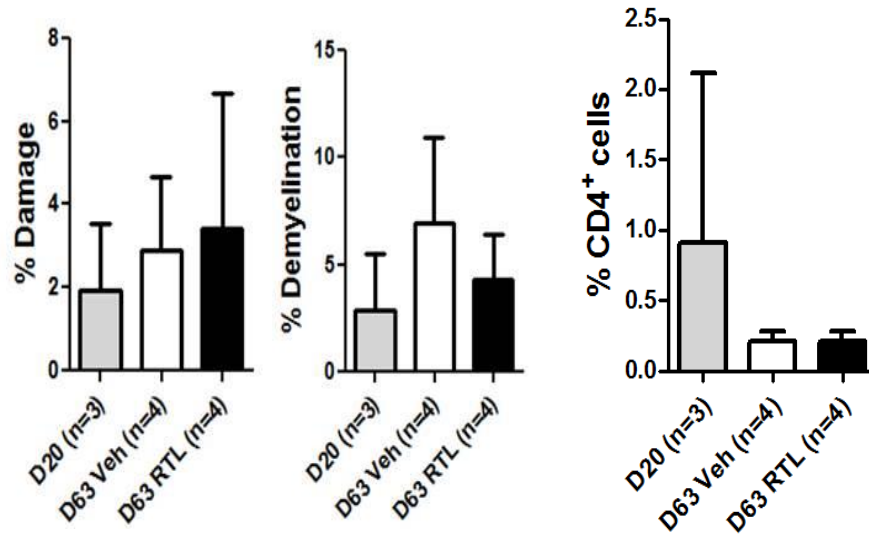

**Figure S2.** Days 20 and 63 p.i. spinal cord lumbar sections from EAE female DR\*1501-Tg mice were stained with luxol fast blue (LFB) and analyzed for demyelination, Toluidine blue for spinal cord damage and CD4<sup>+</sup> cells frequency in spinal cords of RTL342M vs. vehicle treated mice.
